# Supplementary material
Source: publisher site journal article supplement (https://www.dovepress.com/get_supplementary_file.php?f=400068.docx)
Supplement: Supplementary file 1 [file get_supplementary_file.php]

Table s1: Oligonucleotide primer sequences used in PCR and nested multiplex PCR

| Primer name | Primer sequences | Product size |
| --- | --- | --- |
| *polA* gene of TP |  | 377bp |
| Primer 1F | 5’-TGCGCGTGTGCGAATGGTGTGGTC-3’ |  |
| Primer 1R | 5’-CACAGTGCTCAAAAACGCCTGCACG-3’ |  |
| 23SrRNA-outer |  | 629bp |
| TP-23S- OF | 5’-GTACCGCAAACCGACACAG-3’ |  |
| TP-23S- OR | 5’-GCGCGAACACCTCTTTTTAC-3’ |  |
| 23SrRNA-inner |  | 491bp |
| TP-23S- IF | 5’-TGACCCTTGCCTTTGGTGAG-3’ |  |
| TP-23S- IR | 5’-GGATCCACGGCCAAAGGTTA-3’ |  |

Table s2: The clinical and epidemiological characteristics on 204 patients with latent syphilis in this study

|  | **Frequency(n)** | **Percentage(%)** |
| --- | --- | --- |
| **Gender** |  |  |
| Male | 109 | 53.43 |
| Female | 95 | 46.57 |
| **Nationality** |  |  |
| Han | 119 | 58.33 |
| Kazak | 45 | 22.06 |
| Uygur | 25 | 12.25 |
| Hui | 9 | 4.41 |
| Mongolian | 2 | 0.98 |
| Manchu | 2 | 0.98 |
| Miao | 2 | 0.98 |
| Daur | 1 | 0.10 |
| **Age range (years)** |  |  |
| 10-20 | 22 | 10.78 |
| 21-30 | 85 | 41.67 |
| 31-40 | 57 | 27.94 |
| 41-50 | 23 | 11.27 |
| 51-60 | 6 | 2.94 |
| 61-70 | 8 | 3.92 |
| 71-80 | 3 | 1.48 |
| **RPR titer** |  |  |
| 1:8 | 44 | 21.57 |
| 1:16 | 62 | 30.39 |
| 1:32 | 55 | 26.96 |
| 1:64 | 32 | 15.69 |
| 1:128 | 7 | 3.43 |
| 1:256 | 4 | 1.96 |
